# Supplementary material for: Construction of a scalable DNA computing nano-system for large-scale and complex logical operations
Source: Royal Society of Chemistry journal article supplement (doi:10.1039/d2nh00525e), 2022-12-07
Supplement: d2nh00525e1.pdf [file d2nh00525e1.pdf]

# **Construction of Scalable DNA Computing Nano-system for Large-scale and Complex Logical Operations**

Chunyang Zhou,<sup>a</sup> Yiwei Song,<sup>a</sup> Xiuyan Jin,<sup>a</sup> Bei Li,<sup>\*bc</sup> Chunying Pang<sup>\*a</sup>

<sup>a</sup> *Biomedical Engineering, School of Life Science and Technology, Changchun University of Science and Technology, Changchun, 130031, China. Email: 1281957328@qq.com*

<sup>b</sup> *Changchun Institute of optics, precision machinery and physics, Chinese Academy of Sciences, Changchun, 130031. Email: beili@ciomp.ac.cn*

<sup>c</sup> *University of Chinese Academy of Sciences, Beijing 100049.*

**Table S1.** Single-stranded DNA used for the construction of reaction platform.

| Platform (P1-P10) | Strand name          | DNA Sequence (from 5' to 3')            | Modification |
|-------------------|----------------------|-----------------------------------------|--------------|
| P-1               | P <sub>1</sub> -DNA  | TGAAGTG TTATGAATG TT GTAATG TAATG TATGA |              |
|                   | Q <sub>1</sub> -DNA  | ATACAA TCATA CATT A CATTAC              | 3'-BQH1      |
|                   | F <sub>1</sub> -DNA  | CATTCATAACACTTCAATTACA                  | 5'-FAM       |
| P-2               | P <sub>2</sub> -DNA  | AAGTGATAATGTAATGTTGTAAAGTTAAAGATTGT     |              |
|                   | Q <sub>2</sub> -DNA  | AATCAT ACAATCTTAACTTTAC                 | 3'-BQH2      |
|                   | F <sub>2</sub> -DNA  | CATTACATTATCACTTCAATAC                  | 5'-HEX       |
| P-3               | P <sub>3</sub> -DNA  | TGTAATTGAAGTAATGTTGTAAAGTAAAGATTGTA     |              |
|                   | Q <sub>3</sub> -DNA  | TAACTCTACAATCTTACTTTAC                  | 3'-BQH1      |
|                   | F <sub>3</sub> -DNA  | CATTACTTCAATTACAAACATC                  | 5'-FAM       |
| P-4               | P <sub>4</sub> -DNA  | TGATATTGAAGTAATGTTGTAATGTATAGATATT      |              |
|                   | Q <sub>4</sub> -DNA  | ACATTCAATATCTATACATTAC                  | 3'-BQH2      |
|                   | F <sub>4</sub> -DNA  | CATTACTTCAATATCAACTTAA                  | 5'-HEX       |
| P-5               | P <sub>5</sub> -DNA  | AGAGATTAGTTGATAGTTGTATTGATAAGTGAAT      |              |
|                   | Q <sub>5</sub> -DNA  | TCAACAATCACTTATCAATAC                   | 3'-BQH1      |
|                   | F <sub>5</sub> -DNA  | CTATCAACTAATCTCTCACTAT                  | 5'-FAM       |
| P-6               | P <sub>6</sub> -DNA  | GAGAATAGAAGTTAAGTTGATTAGTAAGTGATTA      |              |
|                   | Q <sub>6</sub> -DNA  | CTTATCTAATCACTTACTAATC                  | 3'-BQH2      |
|                   | F <sub>6</sub> -DNA  | CTTAACTTCTATTCTCTCTTAA                  | 5'-HEX       |
| P-7               | P <sub>7</sub> -DNA  | GTTATGATATTGTATGTTGAATGTAATGATTAAT      |              |
|                   | Q <sub>7</sub> -DNA  | TCCATAATTAATCATTACATTC                  | 3'-BQH1      |
|                   | F <sub>7</sub> -DNA  | CATACAATATCATAACATCACT                  | 5'-FAM       |
| P-8               | P <sub>8</sub> -DNA  | GAGAATATGGATAATGTTGAATATGAAGTTGAAG      |              |
|                   | Q <sub>8</sub> -DNA  | CATATCTTCAACTTCATATTC                   | 3'-BQH2      |
|                   | F <sub>8</sub> -DNA  | CATTATCCATATTCTCACCTTA                  | 5'-HEX       |
| P-9               | P <sub>9</sub> -DNA  | TTAAGGTTGAATGTTGTTGTTAGTAATAAGATGT      |              |
|                   | Q <sub>9</sub> -DNA  | TATCTAACATCTTATTACTAAC                  | 3'-BQH1      |
|                   | F <sub>9</sub> -DNA  | CAACATTCAACCTTAATACACT                  | 5'-FAM       |
| P-10              | P <sub>10</sub> -DNA | TGATGTATATGTATAGTTGTTAGATGTATGAAGA      |              |
|                   | Q <sub>10</sub> -DNA | CTACAATCTTCATACATCTAAC                  | 3'-BQH2      |
|                   | F <sub>10</sub> -DNA | CTATACATATACATCATTTCTCA                 | 5'-HEX       |

**Table S2.** Sequence of input DNA used in the operation square root logic circuit.

| Square root Input Library | Subset | DNA Sequence (from 5' to 3')             |
|---------------------------|--------|------------------------------------------|
| A                         | A1     | AGTTAAGATTGTATGATT                       |
|                           | A2     | TAACTCTACAATCTTACT                       |
|                           | A3     | AAATCCTCAACAATTCGTATTGATAAGTGAAT TGGTGA  |
|                           | A4     | ATTAGATAAGTAAGAG                         |
|                           | A5     | GAAGAATATGAAGTAA                         |
|                           | A6     | CCTACTTATCTAACATGTAATAAGATGTTAGATA       |
|                           | A7     | CTACAATCTTCATACATC                       |
|                           | A8     | ATTCAACCTTAATACACT                       |
| B                         | B1     | AGTTAAGATTGTATGATT                       |
|                           | B2     | TGTATAGATATTGAATGT                       |
|                           | B3     | TAACTCTACAATCTTACT                       |
|                           | B4     | CTCTTACTTATCTAATGATTAGTAAGTGATTAGATAAG   |
|                           | B5     | GAATTGTTGAGGATTT                         |
|                           | B6     | GAAGAATATGAAGTAA                         |
|                           | B7     | GTGAAATAAGGTGAGA                         |
|                           | B8     | ATGTTAGATAAGTAGG                         |
|                           | B9     | CTACAATCTTCATACATC                       |
|                           | B10    | TGAGAATGATGTATATGT                       |
| C                         | C1     | TG TAATG TATGATTGTAT                     |
|                           | C2     | AATCAT ACAATCTTAACT                      |
|                           | C3     | GAATTGTTGAGGATTT                         |
|                           | C4     | TTACTTTCATATTCTTCGAATATGAAGTTGAAG AATATG |
|                           | C5     | CCTACT TATCTAACAT                        |
|                           | C6     | CTCTTACTTATCTAAT                         |
| D                         | D1     | TG TAATG TATGATTGTAT                     |
|                           | D2     | AGTAAGATTGTAGAGTTA                       |
|                           | D3     | ACATTCAATATCTATACA                       |
|                           | D4     | ATTAGATAAGTAAGAG                         |
|                           | D5     | TAAGGTGAGAATATGGATAATGTCTCACCTTATTTTAC   |
|                           | D6     | GATGTATGAAGATTGTAG                       |
|                           | D7     | AGTGTATTAAGGTGAAT                        |
|                           | D8     | ACATATACATCATTCTCA                       |

**Table S3.** Sequence of input DNA used in the operation cube root logic circuit.

| Cube root Input Library | Subset | DNA Sequence (from 5' to 3')       |
|-------------------------|--------|------------------------------------|
| A                       | A1     | AGTTAAGATTGTATGATT                 |
|                         | A2     | TTAAGTTGATATTGAAGTATCAACTTAAAAATCC |
|                         | A3     | TCAACAATTCACCTATCA                 |
|                         | A4     | AAGTAAATAGTGAGAG                   |
|                         | A5     | GTGAAATTAAGAGAGA                   |
|                         | A6     | TCCATAATTAATCATTAC                 |
|                         | A7     | GAGAATAGTGATGTTA                   |
|                         | A8     | TATCTAACATCTTATTAC                 |
|                         | A9     | ATGTTTTGAGAATGAT                   |
| B                       | B1     | AGTTAAGATTGTATGATT                 |
|                         | B2     | GGATTTTTAAGTTGAT                   |
|                         | B3     | ACATTCAATATCTATACA                 |
|                         | B4     | TAAGAGGATGTTTGTA                   |
|                         | B5     | TGATAAGTGAATTGTTGA                 |
|                         | B6     | CTTATCTAATCACTTACT                 |
|                         | B7     | CTCTCACTATTTACTT                   |
|                         | B8     | AGTAGGTTAAGAGAGA                   |
|                         | B9     | ATGAAGTTGAAGAATATG                 |
|                         | B10    | TCCATAATTAATCATTAC                 |
|                         | B11    | GTAATAAGATGTTAGATA                 |
|                         | B12    | CTACAATCTTCATACATC                 |
|                         | B13    | GGATAATGAGAATGAT                   |
| C                       | B1     | AGTTAAGATTGTATGATT                 |
|                         | B2     | TGTATAGATATTGAATGT                 |
|                         | B3     | GATGTTTGTAATTGAAGTTACAAACATCCTCTTA |
|                         | B4     | ATCAACTTAAAAATCC                   |
|                         | B5     | AGTAAGTGATTAGATAAG                 |
|                         | B6     | ATAGTGAGAGATTAGTTGCTCTCACTATTTACTT |
|                         | B7     | TCAACAATTCACCTATCA                 |
|                         | B8     | TTAAGAGAGAATAGAAGTTCTCTCTTAATTTAC  |
|                         | B9     | GTAATGATTAATTATGGA                 |
|                         | B10    | CATATTCTCAACTTCAT                  |
|                         | B11    | GATGTATGAAGATTGTAG                 |
|                         | B12    | TGAGAATGATGTATATGTATCATTCTCAAAACAT |
| D                       | D1     | TGTAATGTATGATTGTAT                 |
|                         | D2     | AATCATACAATCTTAACT                 |
|                         | D3     | TCAACAATTCACCTATCA                 |
|                         | D4     | TTAAGAGAGAATAGAAGTTCTCTCTTAACCTACT |
|                         | D5     | AGTGATGTTATGATATTGTAACATCACTATTCTC |
|                         | D6     | TATCTAACATCTTATTAC                 |
|                         | D7     | TGAGAATGATGTATATGTATCATTCTCATTATCC |

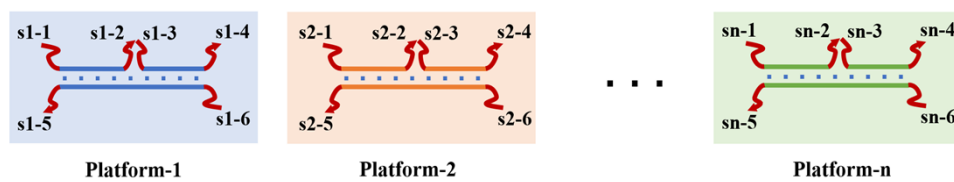

**Fig. S1** Diagram of the combination of monomers forming the reaction platform. Each monomer consists of three single-stranded DNAs and can form up to six encodable sites. In the case of Platform-1, the encoded sites are s1-1, s1-2, s1-3, s1-4, s1-5 and s1-6, which remain single stranded. Each coding site can be modified by fluorophore or quenching group.

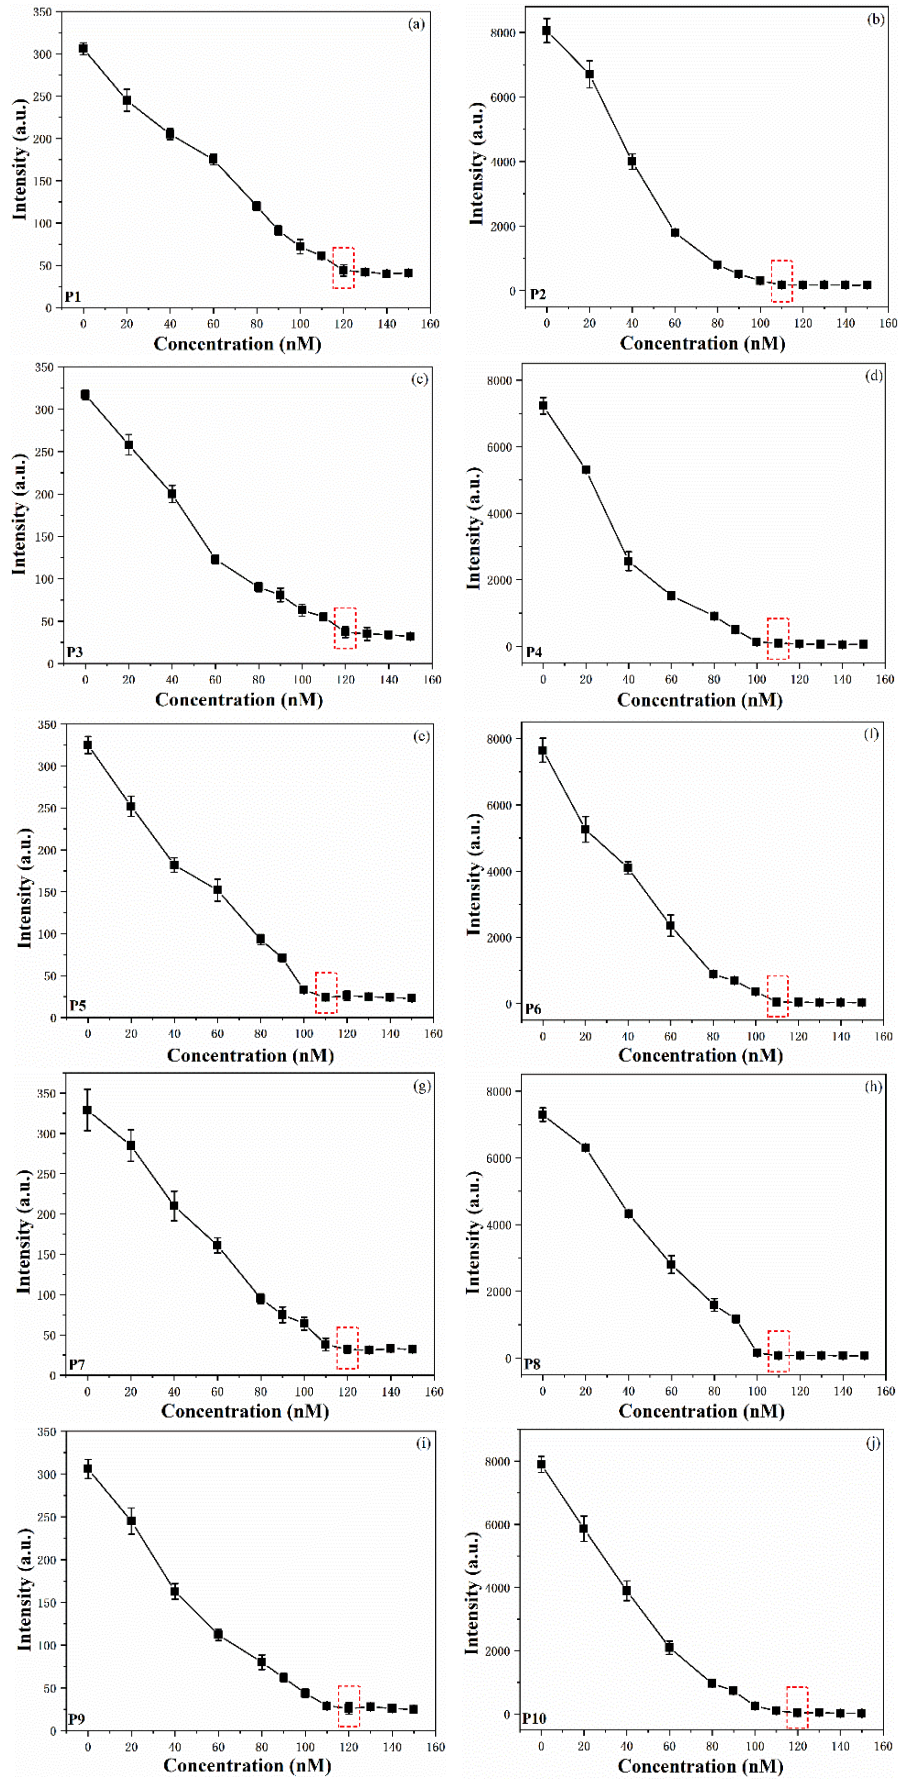

Fig. S2 Optimized concentrations of three single-stranded DNAs that consist of each platform

monomer. As shown in Fig. 2c, the original concentrations of P-DNA and F-DNA are set to 100 nm and mix preferentially, followed by the addition of Q-DNA. As shown in Fig. S3, as the concentration of Q-DNA gradually increases, the fluorescence intensity gradually decreases. When it drops to a minimum the corresponding concentration is the optimal concentration of Q-DNA, which is indicated in the red box in Fig. S3.

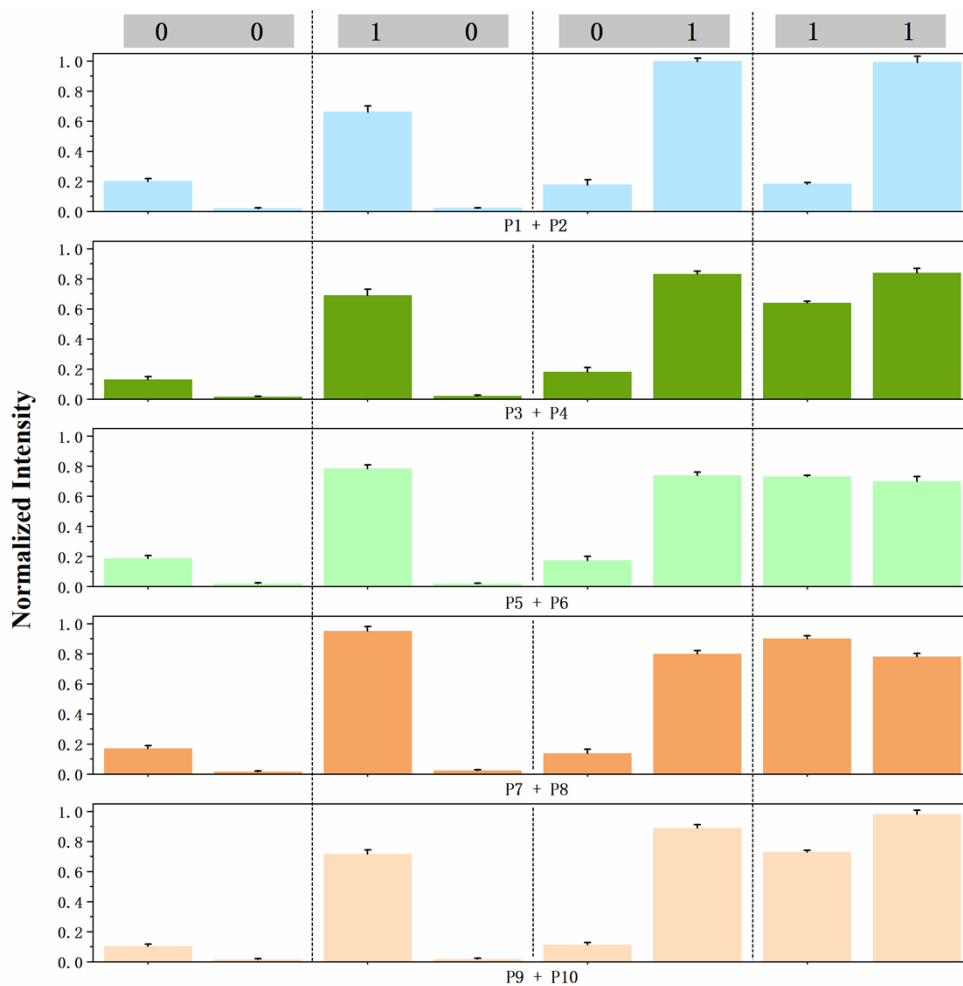

**Fig. S3** The fluorescence intensity changes before and after adding the input sequence into the five subsets. In the mixture of P1+P2, P3+P4, P5+P6, P7+P8, and P9+P10, the fluorescence intensity of each two monomers with the addition of no input DNA (0 0) is the low and ideal background signal. When the addition of the input DNA that can “turn on” any monomer (1 0/0 1) in each mixture, its fluorescence signal was significantly increased, while the fluorescence signal of the other monomer remained low. When the input sequences were added to light up both monomers in the mixture (1 1), both fluorescence signals were significantly improved.



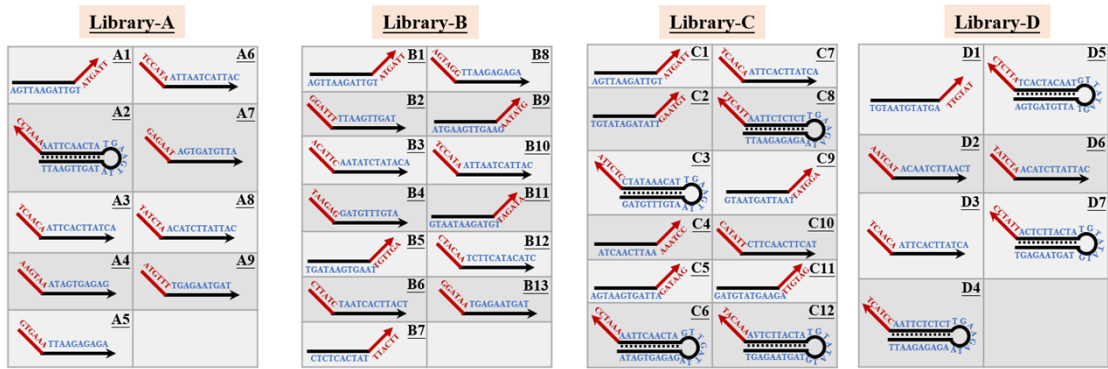

Fig. S4 Display of the input DNA library design for the cube root logic computing.

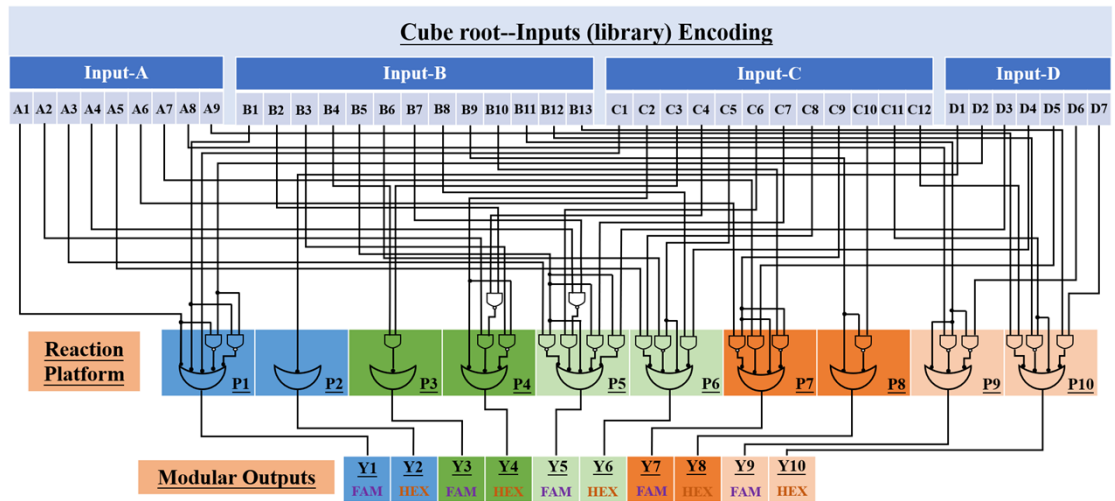

**Fig. S5** Logic circuit diagram for realizing cube root calculation.

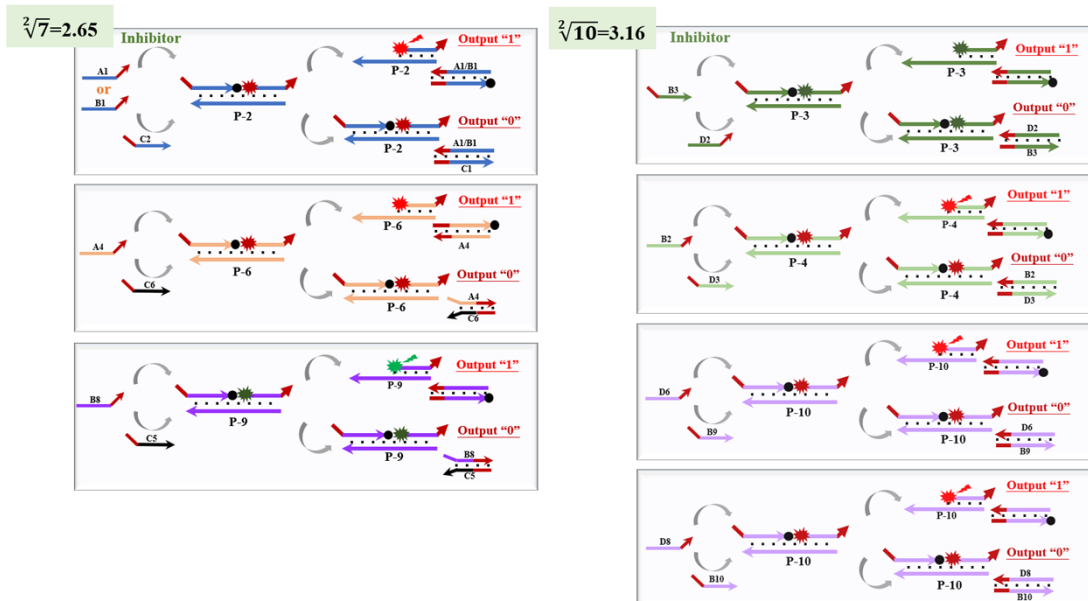

**Fig. S6** Detailed work mechanism of bl-SW in the operation of “ $\sqrt[2]{7}=2.65$ ” and “ $\sqrt[2]{10}=3.16$ ”. The “ON” or “OFF” status of the fluorescence signal was monitored by contrast before and after adding the bl-SW to the reaction platform.

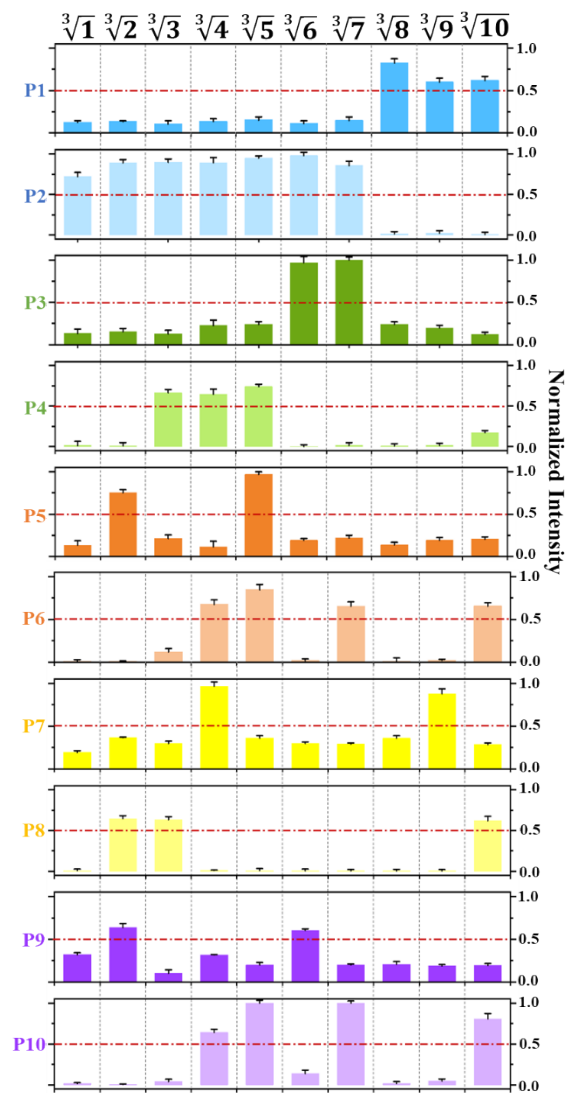

**Fig. S7** Histogram of normalized fluorescence output intensities of P1 to P10 within the calculation range of any integer up to “ $1 \leq x \leq 10$ ” in the cube root operation. The error bars are obtained via three independent experiments and donate standard deviation (S.D.).

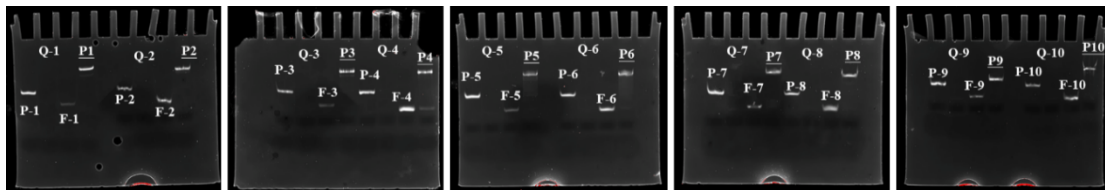

**Fig. S8** Display of the raw gel images corresponding to Fig. 2e.
